# Supplementary material
Source: ML conference proceedings conference paper supplement (https://aclanthology.org/2024.inlg-main.12)
Supplement: Supplementary_Attachment [file 2024.inlg-main.12.Supplementary_Attachment.pdf]

Table 5: Label distribution of datasets. The labels in both datasets are biased towards neutral.

| <b>Dataset</b>  | DailyDialog | reconstructed MEmoR |
|-----------------|-------------|---------------------|
| <b>Positive</b> | 12.7%       | 8.7%                |
| <b>Neutral</b>  | 84.6%       | 80.3%               |
| <b>Negative</b> | 2.7%        | 11.0%               |
| <b>Total</b>    | 100.0%      | 100.0%              |

Table 6: Train/Valid/Test split.

| <b>Dataset</b> | <b>Task</b> | <b>Train</b> | <b>Valid</b> | <b>Test</b> |
|----------------|-------------|--------------|--------------|-------------|
| DailyDialog    | EERC        | 85,570       | 7,962        | 6,632       |
|                | EEFC        | 74,548       | 6,973        | 6,632       |
| reconstructed  | IERC        | 4,767        | 585          | 573         |
| MEmoR          | IEFC        | 7,810        | 742          | 573         |

## A Dataset Details

We show the label distribution of each dataset in Table 5 and the number of data for each task in Table 6. The datasets were split in the same way as the original data for both DailyDialog and reconstructed MEmoR. The train and validation data sizes for EEFC are smaller than those for EERC, and IERC than IEFC. This is because EEFC and IERC require two annotated utterances as the input (i.e., the current utterance and the next emotion, the current emotion and the next utterance). As for the test data, we used the same data for EERC and EEFC, and for IERC and IEFC to compare the results between these tasks.

## B Hyperparameters

The hyperparameters are shown in Table 7. All the models were trained with one GPU (NVIDIA A100). At the end of the training of each task, we loaded the model of the epoch that achieved the highest macro-F1 score on the validation dataset. We fine-tuned Llama 2 using LoRA (Hu et al., 2021).

Table 7: Hyperparameters.

| <b>Model</b>       | <b>Task</b> | <b>Input Variation</b> | <b>Learning Rate</b>   | <b>Batch Size</b> | <b>Epoch</b> |
|--------------------|-------------|------------------------|------------------------|-------------------|--------------|
| Llama-2-13b-hf     | IEFC        | full history           | 1e-5                   | 4                 | 10           |
|                    |             | last uttr              | 2e-5                   | 2                 |              |
|                    |             | no history             | 2e-5                   | 1                 |              |
| DistilRoBERTa-base | EERC        | all                    | warmup from 0 to 5e-05 | 64                | 40           |
|                    | EEFC        |                        |                        | 64                | 60           |
|                    | IERC        |                        |                        | 128               | 40           |
|                    | IEFC        |                        |                        | 128               | 40           |
